# Supplementary material
Source: PubMed Central journal article supplement (PMC5037005)
Supplement: NIHMS801358-supplement-Supplemental_Figure_1.pdf [file NIHMS801358-supplement-Supplemental_Figure_1.pdf]

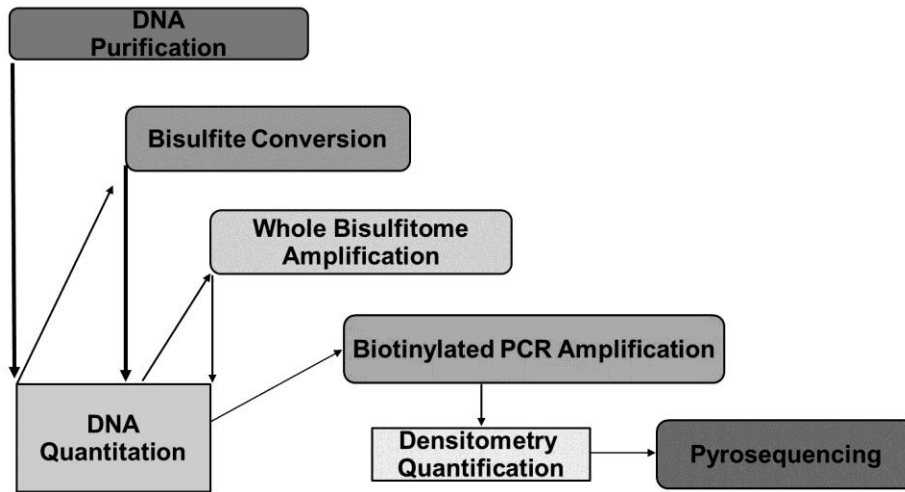

**Supplemental Figure 1: Experimental Workflow of HPV16 Positive Samples.** Participant samples were purified, bisulfite treated and converted, expanded via whole bisulfite amplification, and sent for Pyrosequencing.
