# Supplementary material
Source: PubMed Central journal article supplement (PMC5037005)
Supplement: NIHMS801358-supplement-Supplemental_Table_1.pdf [file NIHMS801358-supplement-Supplemental_Table_1.pdf]

**Supplemental Table 1. Sequences of PCR Amplification and Sequencing Primers and Dispensation Order**

|          | <b>PCR Amplification Primers</b>               | <b>Pyrosequencing Primer</b> | <b>Dispensation Order*</b>                              |
|----------|------------------------------------------------|------------------------------|---------------------------------------------------------|
| 4391F    | TGTATTTTTTGGTGGGTTAGGA                         |                              |                                                         |
| 4391R    | Biotin-<br>ACTATAAAAAACCTTATTCCCAAT            |                              |                                                         |
| 4391seq  |                                                | TTGGTGGGTTAGGAATT            | AGTACTATGTCGT<br>ATATGTCGTATCG<br>T                     |
| 4815F    | GAAGAAATTTTTATGGATATATTATTG<br>TT              |                              |                                                         |
| 4815R    | Biotin-<br>CCACATCTATACCTTCATATACAAAATT<br>A   |                              |                                                         |
| 4815seq  |                                                | AGGGTTTAGTTTAGTGG            | ACTGATCGTAGAT<br>ATATATGTCGT                            |
| D5011F   | AGGTTTGTACGAGTAGTTTTTTTTTTAG<br>GA             |                              |                                                         |
| D5011R   | Biotin-<br>AACCCAACGTTATTTAATAATAAAAACC<br>TCC |                              |                                                         |
| D5011Seq |                                                | AGTAGTTTTTTTTTTAG<br>GAGT    | TGAGAG <u>C</u> TGATC<br>GTATGTCGTTGTA<br>TCGCTAGTATCGT |

|          |                                     |                              |                                                                                  |
|----------|-------------------------------------|------------------------------|----------------------------------------------------------------------------------|
|          |                                     |                              | TATATGTCAGTC                                                                     |
| D5013F   | GGGTTTATAGTTTTTGTATTTAGG            |                              |                                                                                  |
| D5013R   | Biotin-<br>ACCAACTCCCGCAACTCAATAAAC |                              |                                                                                  |
| D5013Seq |                                     | GGTTTATAGTTTTTGTA<br>TTTAGGT | <b><u>G</u></b> CCTATAGTCTGT<br>CGTTATGTTTCAGT<br>CGCTAGTGATTGG<br>ATGTCGTGATGTC |

\*Bisulfite Internal Control underlined and bolded
