# Supplementary material
Source: PubMed Central journal article supplement (PMC5037005)
Supplement: NIHMS801358-supplement-Supplemental_Table_2.pdf [file NIHMS801358-supplement-Supplemental_Table_2.pdf]

**Supplemental Table 2: Genotyping of Single Nucleotide Polymorphisms**

| <i>Methylene Tetrahydrofolate Reductase (MTHFR)</i>                  |        |           |                |
|----------------------------------------------------------------------|--------|-----------|----------------|
| <i>rs1801133</i>                                                     | C677T  | Ala222Val | C__1202883_20  |
| <i>rs1801131</i>                                                     | A1298C | Glu429Ala | C___850486_20  |
| <i>5-Methyltetrahydrofolate-homocysteine methyltransferase (MTR)</i> |        |           |                |
| <i>rs1805087</i>                                                     | A2756G | Asp919Gly | C__12005959_10 |
| <i>Betaine-homocysteine methyltransferase (BHMT)</i>                 |        |           |                |
| <i>rs3733890</i>                                                     | G821A  | Arg239Gln | C__11646606_20 |
| <i>Thymine DNA glycosylase (TDG)</i>                                 |        |           |                |
| <i>rs4135113</i>                                                     | G595A  | Gly199Ser | C__31582396_10 |
| <i>rs61937630</i>                                                    | A602C  | Lys201Thr | C__89759733_10 |
| <i>Methyl Binding Domain 4 (MBD4, also known as MED1)</i>            |        |           |                |
| <i>rs2307289</i>                                                     | T1024C | Ser342Pro | C__16196053_10 |
| <i>rs140693</i>                                                      | G1036A | Glu346Lys | C___399951_20  |
| <i>X-ray cross-complementing group 1 (XRCC1)</i>                     |        |           |                |
| <i>rs1799782</i>                                                     | C580T  | Arg194Trp | C__11463404_10 |
| <i>rs25487</i>                                                       | A1196G | Gln399Arg | C___622564_10  |
| <i>rs25489</i>                                                       | G839A  | Arg280His | C___622570_10  |
