# Supplementary material
Source: PubMed Central journal article supplement (PMC5037005)
Supplement: NIHMS801358-supplement-Supplemental_Table_3.pdf [file NIHMS801358-supplement-Supplemental_Table_3.pdf]

| Participant | visits with methylation data | cytology at the visits with methylation data | Persistent | Ethnic | HPV16 L2 % Methylation |          |          |          |
|-------------|------------------------------|----------------------------------------------|------------|--------|------------------------|----------|----------|----------|
|             |                              |                                              |            |        | Visit                  |          |          |          |
|             |                              |                                              |            |        | CpG 4427               | CpG 4437 | CpG 4441 | CpG 4894 |
| 1           | 4, 6, 7                      | ASCUS, ASCUS, NEG                            | YES        | EA     | 0                      | 10       | 1        | 4        |
| 2           | 4,5,6,7,9,10                 | visits 4-9 NEG, 10 LSIL                      | YES        | EA     | 1                      | 4        | 3        | -        |
| 3           | 4,5,6,7                      | visits 4-6 NEG, 7 ASCUS                      | YES        | EA     | 0                      | 1        | 0        | 0        |
| 4           | 3, 4                         | NEG, NEG                                     | NO         | EA     | 8                      | 10       | 10       |          |
| 5           | 2,3,4,5,7                    | All NEG                                      | YES        | AA     | 0                      | 1        | 1        | 7        |
| 6           | 4,5,6,8                      | NEG, LSIL, NEG, HSIL                         | YES        | AA     | -                      | -        | -        | 6        |
| 7           | 1,3,4,5,6,8                  | All NEG except #5 ASCUS                      | YES        | EA     | -                      | -        | -        | 0        |
| 8           | 1,3,4                        | LSIL, NEG, ASCUS                             | YES        | AsAm   | 0                      | 0        | 0        | 5        |
| 9           | 5,6,7                        | NEG, NEG, LSIL                               | YES        | EA     | 0                      | 0        | 0        | -        |
| 10          | 7,8                          | NEG, NEG                                     | NO         | AA     | 0                      | 1        | 1        | 3        |
| 11          | 4,5,6                        | NEG, NEG, NEG                                | YES        | EA     | 2                      | 1        | 17       | 0        |
| 12          | 5,8                          | ASCUS, ASCUS                                 | YES        | AA     | -                      | -        | -        | 21       |
| 13          | 3, 5, 6                      | LSIL, NEG, NEG                               | YES        | EA     | -                      | -        | -        | 22       |
| 14          | 3,4                          | NEG, NEG                                     | NO         | AA     | 0                      | 1        | 1        | -        |
| 15          | 2,3,6                        | NEG, NEG, NEG                                | YES        | EA     | 0                      | 0        | 0        | -        |
| 16          | 2,3,4                        | NEG, NEG, NEG                                | YES        | EA     | 6                      | 27       | 23       | -        |
| 17          | 3,4                          | NEG, NEG                                     | YES        | AA     | -                      | -        | -        | 57       |
| 18          | 3,5,6,7                      | LSIL, NEG, NEG, NEG                          | YES        | EA     | 40                     | 79       | 81       | -        |
| 19          | 1,5                          | NEG, NEG                                     | YES        | EA     | 41                     | 70       | 67       | 62       |
| 20          | 1,3                          | NEG, NEG                                     | YES        | EA     | 38                     | 53       | 47       | -        |
| 21          | 1,2                          | LSIL, NEG                                    | NO         | EA     | 12                     | 16       | 13       | 12       |
| 22          | 4,6                          | NEG, NEG                                     | YES        | EA     | 41                     | 55       | 50       | 64       |
| 23          | 2,4,5,6                      | NEG, ASCUS, NEG, HSIL                        | YES        | AA     | 40                     | 67       | 72       | 34       |
| 24          | 3,4,7                        | ASCUS, NEG, NEG                              | YES        | EA     | 31                     | 46       | 45       | -        |
| 25          | 1,4,7                        | NEG, NEG, NEG                                | YES        | AA     | 47                     | 61       | 66       | 46       |
| 26          | 2,3                          | ASCUS, LSIL                                  | YES        | EA     | 48                     | 69       | 70       | 53       |
| 27          | 7, 8                         | NEG, LSIL                                    | YES        | EA     | 27                     | 40       | 29       | 51       |

2 HSIL = 2.4%  
9 LSIL = 11.0%

10 ASCUS = 12.2%  
61 NEG = 74.4%

|          | HPV16 L2 % Methylation |          |          |          |          | HPV16 L2 % Methylation |          |          |          |  |
|----------|------------------------|----------|----------|----------|----------|------------------------|----------|----------|----------|--|
|          | Visit                  |          |          |          |          | Visit                  |          |          |          |  |
| CpG 4906 | CpG 4427               | CpG 4437 | CpG 4441 | CpG 4894 | CpG 4906 | CpG 4427               | CpG 4437 | CpG 4441 | CpG 4894 |  |
| 4        | 1                      | 11       | 13       | 0        | 2        | 0                      | 0        | 0        | 0        |  |
| -        | 0                      | 5        | 0        | -        | -        | 11                     | 36       | 32       | 3        |  |
| 6        | 1                      | 1        | 0        | -        | -        | 1                      | 1        | 1        | 5        |  |
|          | 1                      | 1        | 0        | -        | -        |                        |          |          |          |  |
| 0        |                        |          |          | 8        | 1        | 6                      | 6        | 1        | 10       |  |
| 4        | 0                      | 0        | 0        | 8        | 0        | 0                      | 1        | 1        | 0        |  |
| 0        | 8                      | 4        | 8        | 29       | 15       | 1                      | 1        | 0        | 0        |  |
| 5        | 1                      | 0        | 0        | -        | -        | 1                      | 13       | 15       | 5        |  |
| -        | 9                      | 2        | 0        | 12       | 0        | 0                      | 5        | 0        | 4        |  |
| 4        | 3                      | 3        | 0        | 0        | 3        |                        |          |          |          |  |
| 8        | 0                      | 0        | 0        | 9        | 6        | -                      | -        | -        | 7        |  |
| 19       | 0                      | 0        | 0        | 3        | 5        |                        |          |          |          |  |
| -        | 0                      | 1        | 0        | 2        | 2        | 10                     | 23       | 23       | -        |  |
| -        | 1                      | 1        | 1        | -        | -        |                        |          |          |          |  |
| -        | 1                      | 1        | 0        | 6        | 6        | 0                      | 0        | 0        | 0        |  |
| -        | 5                      | 23       | 18       | -        | -        | 7                      | 57       | 32       | -        |  |
| 76       | -                      | -        | -        | 67       | 69       |                        |          |          |          |  |
| -        | -                      | -        | -        | 75       | 76       | -                      | -        | -        | 55       |  |
| 68       | 49                     | 66       | 71       | 49       | -        |                        |          |          |          |  |
| -        | -                      | -        | -        | 47       | 44       |                        |          |          |          |  |
| 15       | 28                     | 40       | 30       | 54       | 48       |                        |          |          |          |  |
| 63       | 16                     | 20       | 14       | -        | -        |                        |          |          |          |  |
| 31       | -                      | -        | -        | 64       | 62       | 59                     | 76       | 85       | 62       |  |
| -        | 17                     | 22       | 26       | 54       | 49       | -                      | -        | -        | 62       |  |
| 31       | 54                     | 73       | 80       | 41       | 40       | -                      | -        | -        | 42       |  |
| 66       | 38                     | 59       | 77       | 58       | 55       |                        |          |          |          |  |
| 59       | -                      | -        | -        | 11       | 10       |                        |          |          |          |  |

|          | HPV16 L2 % Methylation |          |          |          |          | HPV16 L2 % Methylation |          |          |          |  |
|----------|------------------------|----------|----------|----------|----------|------------------------|----------|----------|----------|--|
|          | Visit                  |          |          |          |          | Visit                  |          |          |          |  |
| CpG 4906 | CpG 4427               | CpG 4437 | CpG 4441 | CpG 4894 | CpG 4906 | CpG 4427               | CpG 4437 | CpG 4441 | CpG 4894 |  |
| 0        |                        |          |          |          |          |                        |          |          |          |  |
| 14       | 6                      | 29       | 26       | 26       | -        | 28                     | 56       | 61       | -        |  |
| 0        | 1                      | 1        | 0        | 5        | 0        |                        |          |          |          |  |

|   |   |   |    |   |   |   |   |   |   |
|---|---|---|----|---|---|---|---|---|---|
| 7 | 1 | 8 | 12 | 7 | 4 | 0 | 1 | 0 | 8 |
| 3 | 8 | 7 | 13 | 1 | 3 |   |   |   |   |
| 6 | 1 | 2 | 1  | 3 | 2 | 0 | 0 | 0 | 7 |

|   |
|---|
| 5 |
|---|

|   |
|---|
| 7 |
|---|

|   |
|---|
| 7 |
|---|

|   |
|---|
| - |
|---|

|   |
|---|
| 3 |
|---|

|   |
|---|
| - |
|---|

|    |   |   |   |    |    |
|----|---|---|---|----|----|
| 44 | - | - | - | 64 | 69 |
|----|---|---|---|----|----|

|    |    |    |    |   |   |
|----|----|----|----|---|---|
| 47 | 32 | 37 | 40 | - | - |
|----|----|----|----|---|---|

|    |
|----|
| 65 |
|----|

|    |
|----|
| 41 |
|----|

| HPV16 L2 % Methylation |          |          |          |          |          |
|------------------------|----------|----------|----------|----------|----------|
| Visit                  |          |          |          |          |          |
| CpG 4906               | CpG 4427 | CpG 4437 | CpG 4441 | CpG 4894 | CpG 4906 |
| -                      | 3        | 75       | 4        | 0        | 12       |

|   |
|---|
| 4 |
|---|

|   |   |   |   |   |   |
|---|---|---|---|---|---|
| 7 | 2 | 7 | 7 | 0 | 0 |
|---|---|---|---|---|---|
